# Supplementary material for: Electropositive Membrane Prepared via a Simple Dipping Process: Exploiting Electrostatic Attraction Using Electrospun SiO2/PVDF Membranes with Electronegative SiO2 Shell
Source: MDPI journal article supplement (doi:10.3390/polym15102270), 2023-05-11
Supplement: s1 [file s1]

## Supporting Information

| samples                                             | Before attachment (mg) | After attachment (mg) | Wt. difference (mg) | Increase of Wt (%) |
|-----------------------------------------------------|------------------------|-----------------------|---------------------|--------------------|
| 1                                                   | 8.0                    | 9.0                   | 1.0                 | 12.50 %            |
| 2                                                   | 9.3                    | 11.0                  | 1.7                 | 18.28 %            |
| 3                                                   | 9.1                    | 10.1                  | 1.0                 | 10.99 %            |
| 4                                                   | 9.2                    | 10.3                  | 1.1                 | 11.96 %            |
| 5                                                   | 8.7                    | 10.0                  | 1.3                 | 14.94 %            |
| 6                                                   | 10.8                   | 12.0                  | 1.2                 | 11.11 %            |
| 7                                                   | 10.3                   | 11.7                  | 1.4                 | 13.59 %            |
| 8                                                   | 9.6                    | 10.7                  | 1.1                 | 11.46 %            |
| 9                                                   | 10.2                   | 11.4                  | 1.2                 | 11.76 %            |
| 10                                                  | 10.1                   | 11.1                  | 1.0                 | 9.90 %             |
| Average 12.65 wt% boehmite was attached by membrane |                        |                       |                     |                    |

**Figure S1.** Attachment of boehmite onto the electrospun SiO<sub>2</sub>/PVDF membrane
